# Supplementary material for: Surface molecularly imprinted polymers with dummy templates for the separation of dencichine from Panax notoginseng
Source: Royal Society of Chemistry journal article supplement (doi:10.1039/c5ra06749a), 2015-01-01
Supplement: c5ra06749a1.pdf [file c5ra06749a1.pdf]

## Supporting Information

**Table S1.** The lifetime of polymers.

| polymers       | Recoveries (%) |                 |                 |                 |                 |
|----------------|----------------|-----------------|-----------------|-----------------|-----------------|
|                | 5 <sup>d</sup> | 10 <sup>d</sup> | 15 <sup>d</sup> | 20 <sup>d</sup> | 30 <sup>d</sup> |
| A <sup>a</sup> | 84.3           | 84.1            | 83.4            | 83.2            | 82.7            |
| B <sup>b</sup> | 84.2           | 83.6            | 83.8            | 83.1            | 82.2            |
| C <sup>c</sup> | 84.7           | 84.2            | 84.1            | 83.7            | 82.9            |

<sup>a</sup> Polymers were damaged at 250 °C for 24 h, then the adsorption capacity of MISPE column was investigated.

<sup>b</sup> Polymers were soaked with 35% hydrochloric acid for 24 h, then the adsorption capacity of MISPE column was investigated.

<sup>c</sup> Polymers were soaked with 15% NaOH solution for 24 h, then the adsorption capacity of MISPE column was investigated.

<sup>d</sup> The used times of polymers.

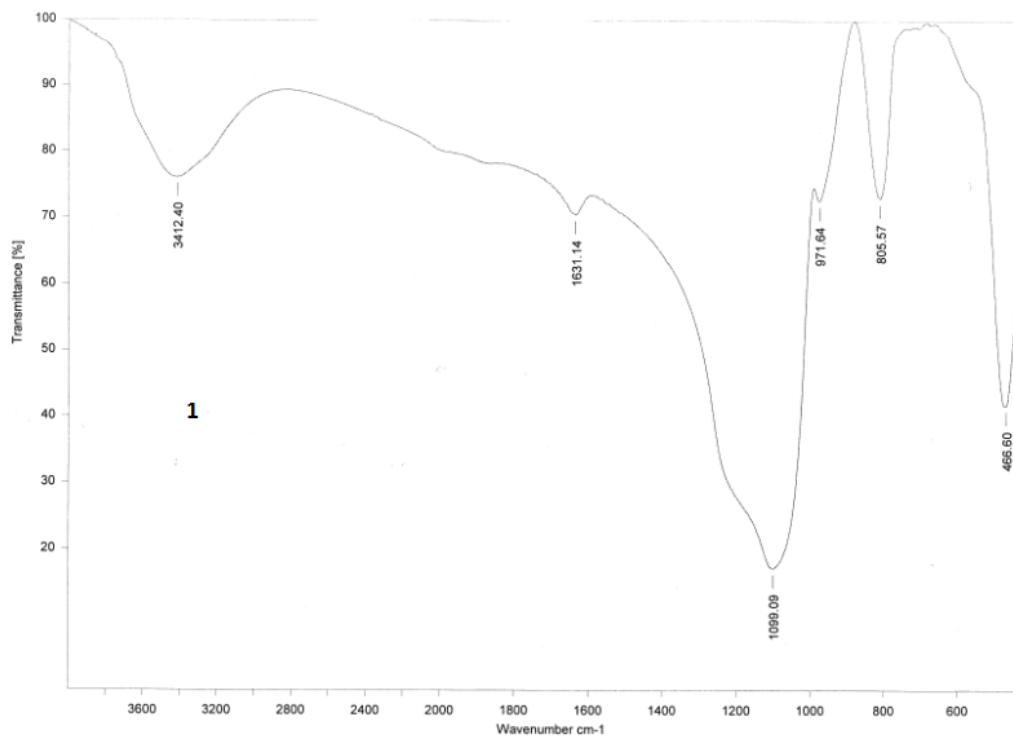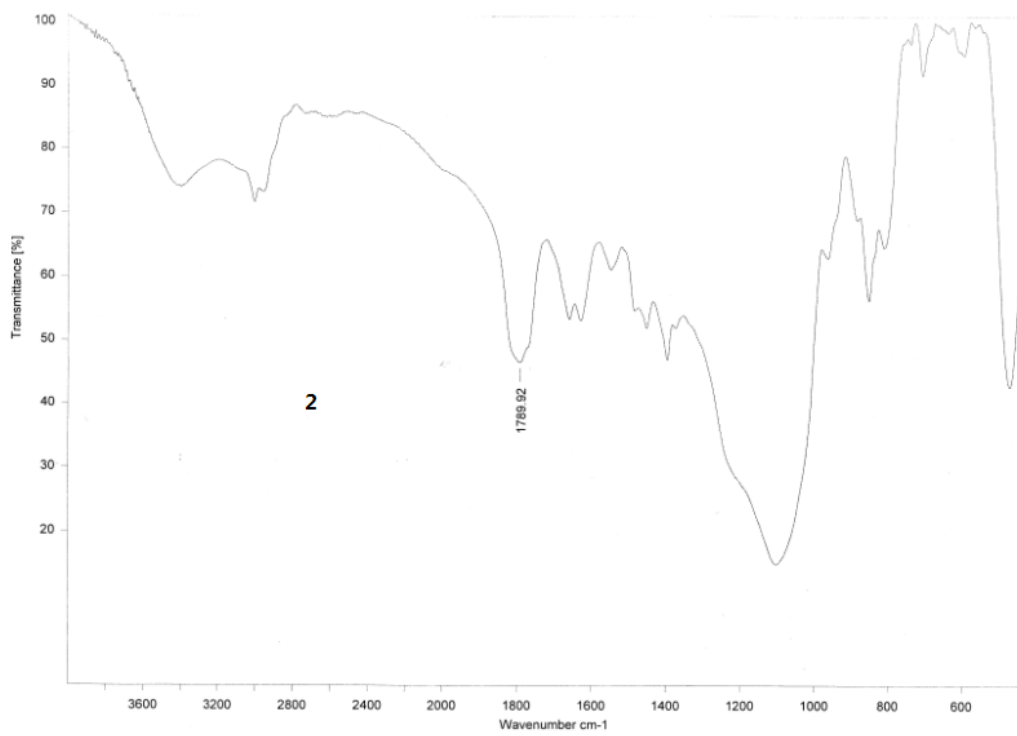

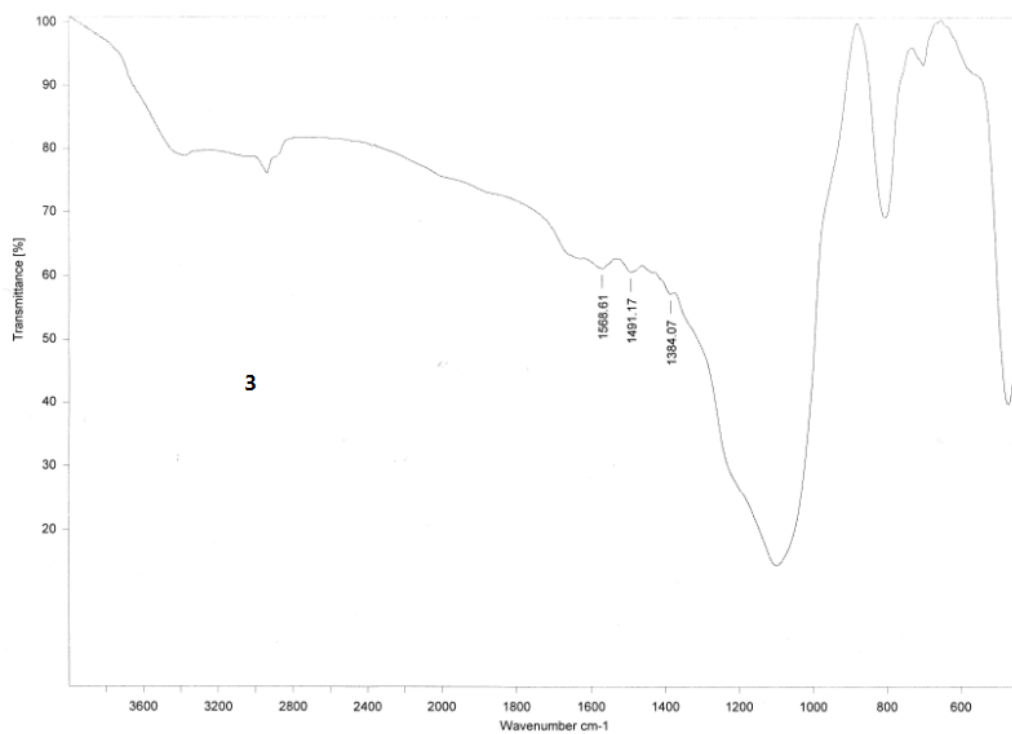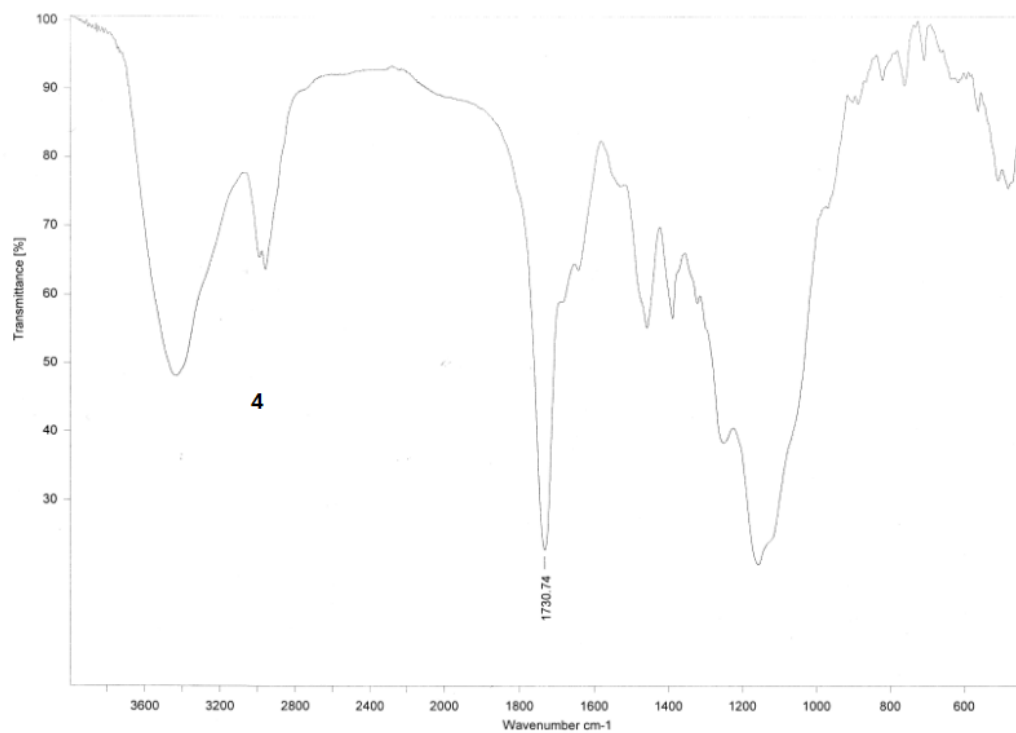

**Fig. S1.** The FT-IR diffuse reflectance spectra of (1) pure silica, (2) AA-APTES-silica, (3) APTES-silica and (4) SiO<sub>2</sub>@LG-MIP.

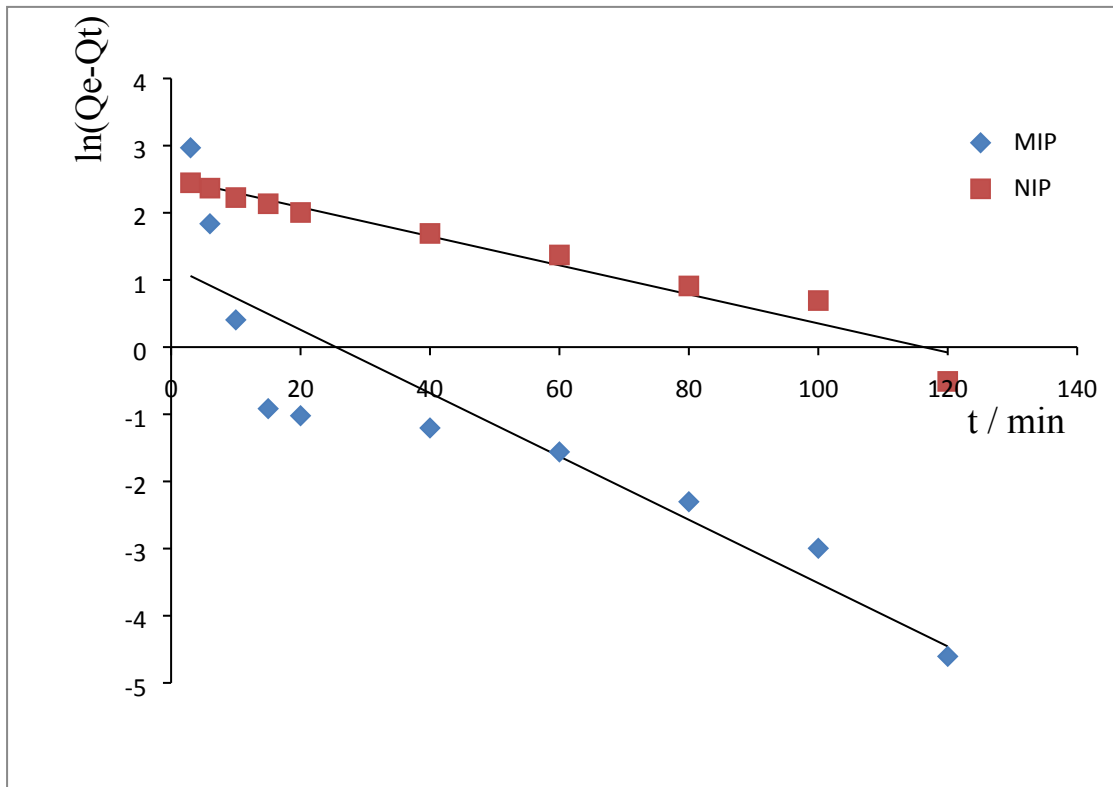

**Fig. S2.** Pseudo-first order sorption kinetics of dencichine onto MIP and NIP.

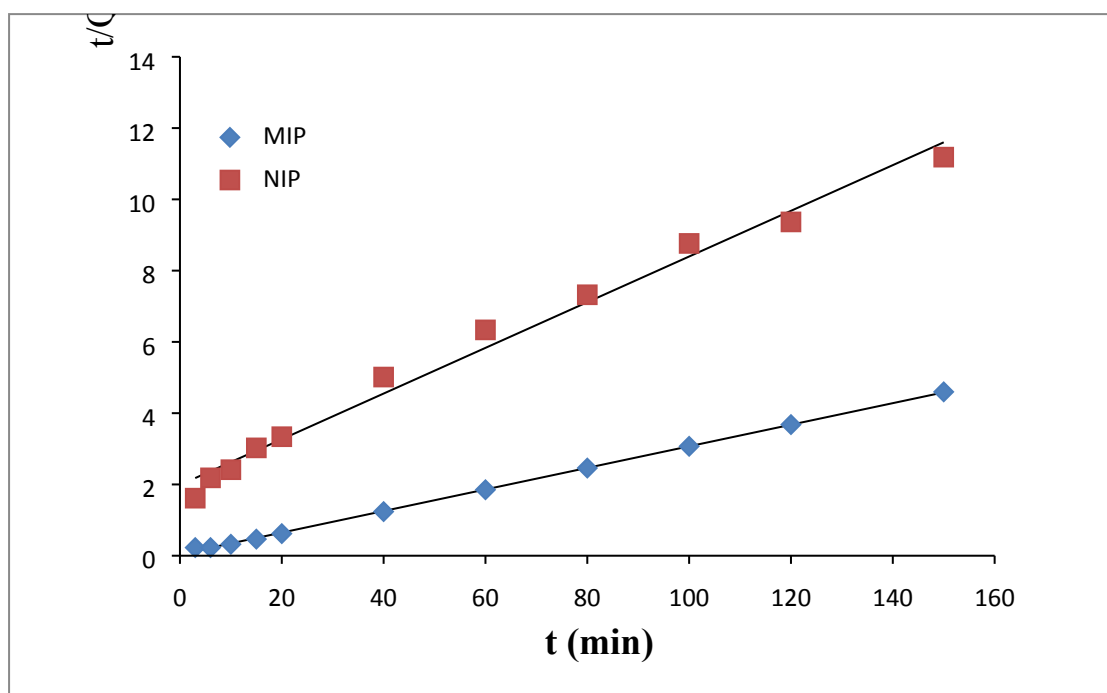

**Fig. S3.** Pseudo-second order sorption kinetics of dencichine onto MIP and NIP.

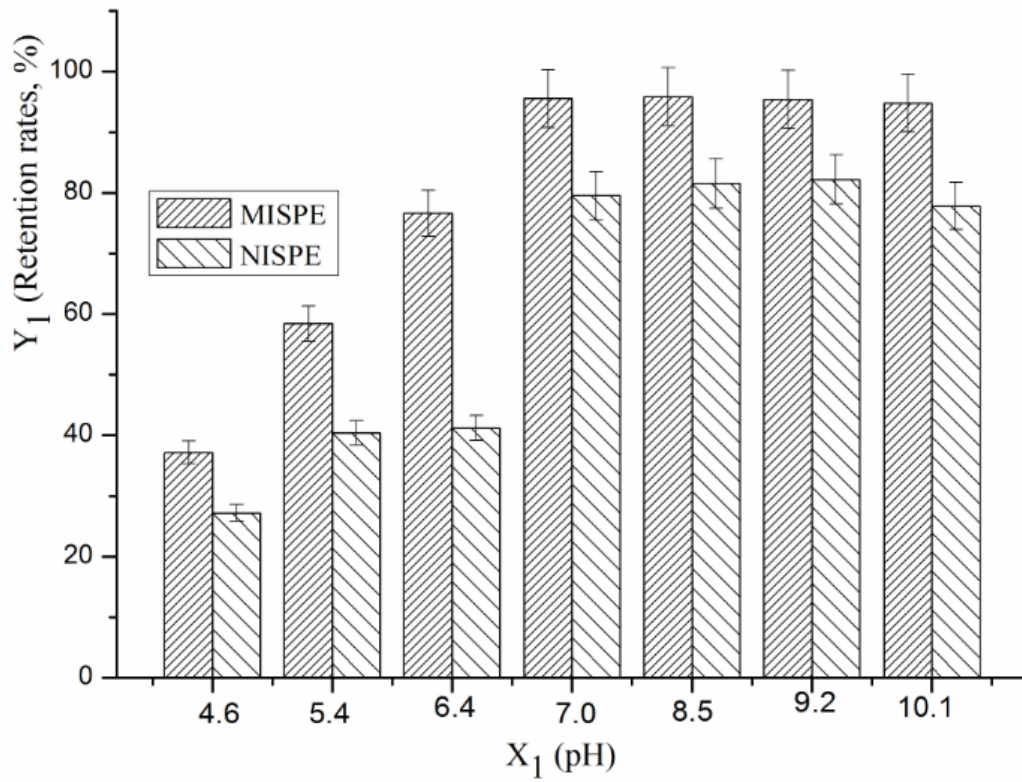

**Fig. S4.** Effect of pH on the retention rate of dencichine.

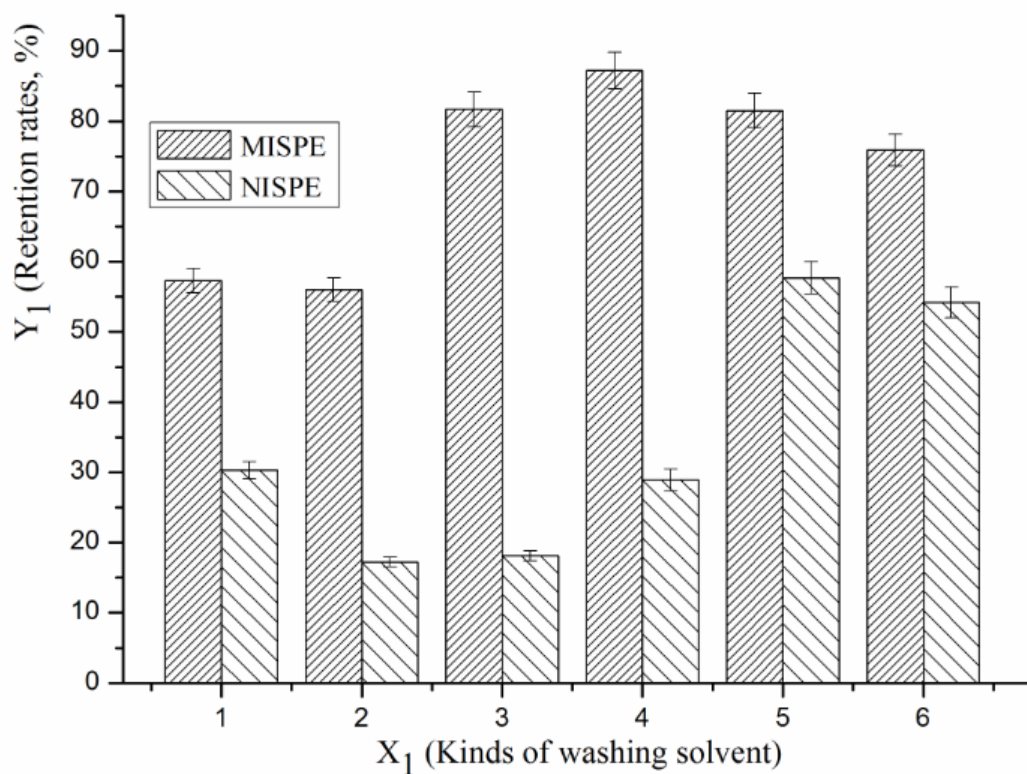

**Fig. S5.** Effect of washing solvents on the retention rate of dencichine. (1) methanol, (2) methanol-H<sub>2</sub>O (10:1, v/v), (3) acetone, (4) acetone-H<sub>2</sub>O (10:1, v/v), (5) tetrahydrofuran, (6) acetonitrile.
